# Supplementary material for: Isthmin 1 is Expressed by Progenitor-Like Cells in the Lung: Phenotypical Analysis of Isthmin 1+ Hematopoietic Stem-Like Cells in Homeostasis and during Infection
Source: Hindawi journal article supplement (doi:10.1155/2022/2909487), 2022-04-01
Supplement: f1 [file 2909487.f1.pdf]

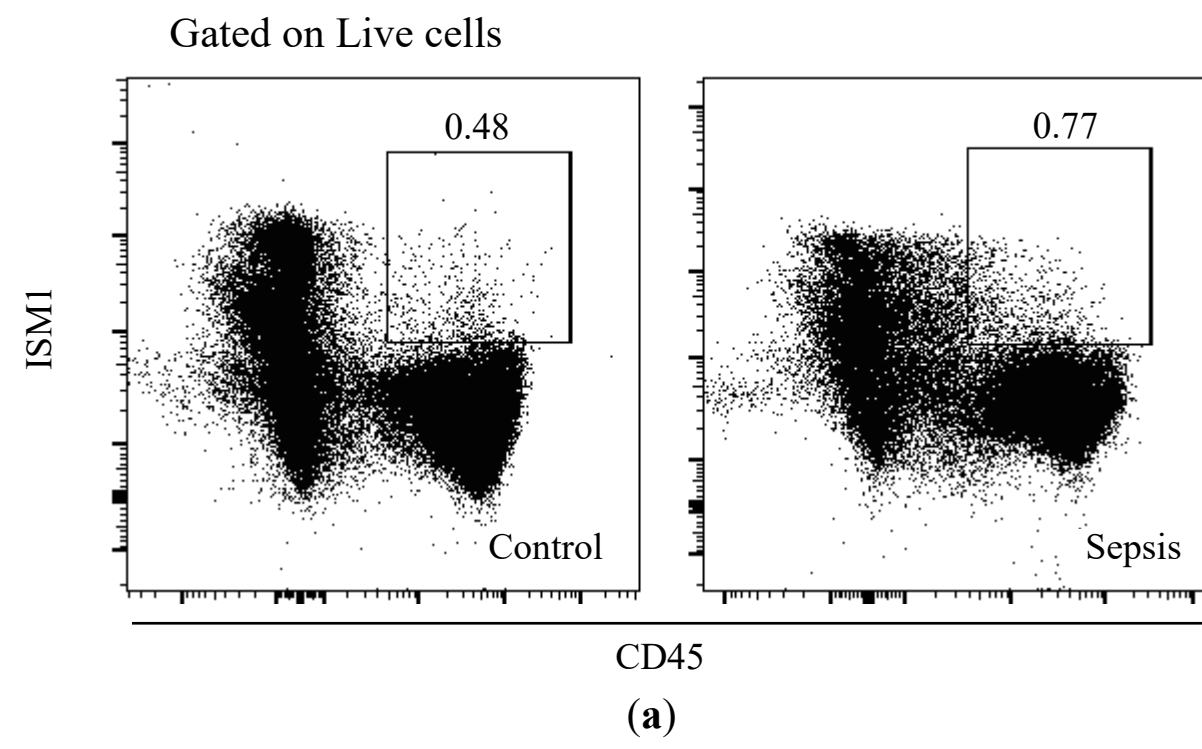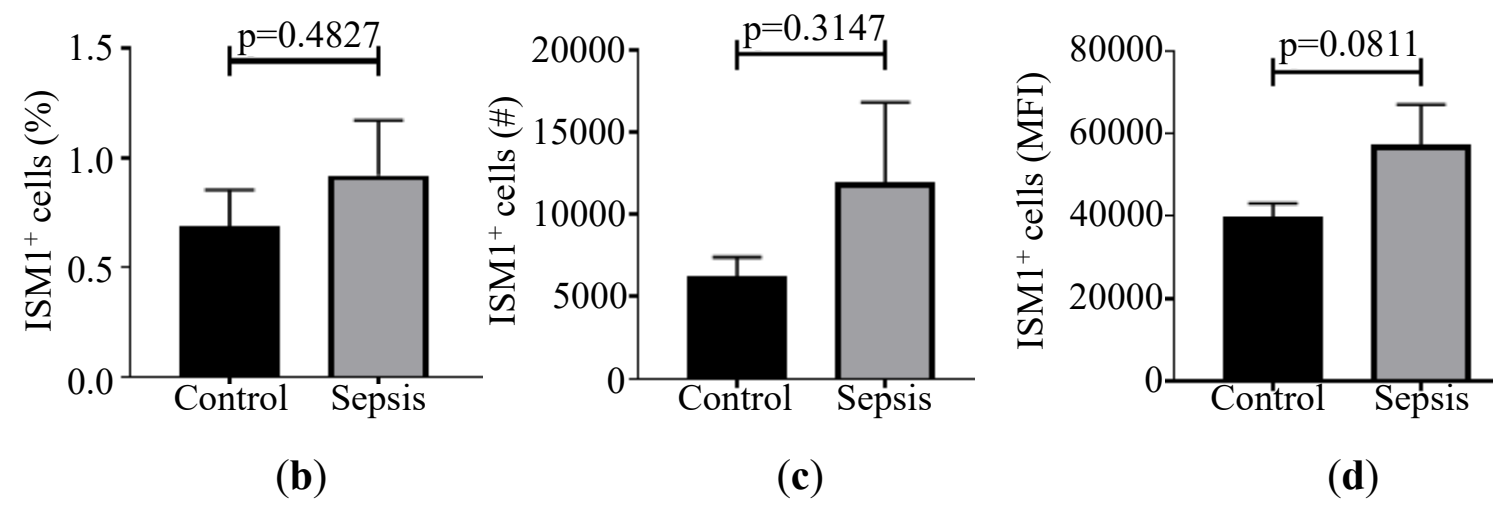

Fig. S1. Changes in ISM1<sup>+</sup>CD45<sup>+</sup> cells after *P. aeruginosa* challenge. (a). Lung cells were stained with antibodies that recognize ISM1 and CD45 following *P. aeruginosa* challenge. Percentages (b), absolute numbers (c), and MFI (d) are shown. A representative experiment (out of 3) is shown.

| Marker                             | Antigen         | Fluorochrome | Reactivity  | Clone      | Brand       | Dilution |
|------------------------------------|-----------------|--------------|-------------|------------|-------------|----------|
| Homing integrins                   | CD49A           | APC          | Mouse       | HMA1       | Biologend   | 3:200    |
|                                    | CD49B           | EF-450       | Mouse       | DX5        | Ebioscience | 2:200    |
|                                    | CD49D           | FITC         | Mouse       | R1-2       | Biologend   | 2:200    |
| Leukocyte common antigen           | CD45            | AF700        | Mouse       | 30F11      | Biologend   | 1:200    |
|                                    | CD45            | APC          | Mouse       | 30F11      | Biologend   | 1:200    |
| T cell                             | CD3E            | PERCP-CY5.5  | Mouse       | 145-EC11   | Tonbo       | 5:200    |
| B cell                             | CD19            | PERCP-CY5.5  | Mouse       | 1D3/CD19   | Biologend   | 5:200    |
| T cell CD8 <sup>+</sup>            | CD8A            | PERCP-CY5.5  | Mouse       | 53-6.7     | Biologend   | 5:200    |
| T cell CD4 <sup>+</sup>            | CD4             | PE           | Mouse       | GK1.5      | Ebioscience | 4:200    |
|                                    | CD4             | PE-CY7       | Mouse       | GK1.5      | Ebioscience | 4:200    |
|                                    | CD4             | AF488        | Mouse       | GK1.5      | Ebioscience | 4:200    |
|                                    | CD4             | APC-CY7      | Mouse       | GK1.5      | Ebioscience | 4:200    |
|                                    | CD4             | PERCP-CY5.5  | Mouse       | GK1.5      | Ebioscience | 4:200    |
| Erythrocytes                       | TER119          | PERCP-CY5.5  | Mouse       | TER119     | Biologend   | 5:200    |
| Mast cells                         | FcRε1A          | PERCP-CY5.5  | Mouse       | MAR-1      | Biologend   | 5:200    |
| Monocytes/Macrophages              | CD11B           | PERCP-CY5.5  | Mouse/Human | M1-70      | Tonbo       | 5:200    |
| Dendritic cells                    | CD11C           | PERCP-CY5    | Mouse       | N418       | Biologend   | 5:200    |
| Natural killers                    | NK1.1           | PERCP-CY5.5  | Mouse       | PK136      | Biologend   | 3:200    |
| Innate lymphoid cells              | ST2             | APC          | Mouse       | DIH9       | Biologend   | 3:200    |
|                                    | CD335 (NKp46)   | BV421        | Mouse       | 29A1.4     | Biologend   | 3:200    |
|                                    | CD127 (IL7R)    | VF450        | Mouse       | A7R34      | Tonbo       | 3:200    |
| Mesenchymal and stromal cells      | CD90.2          | AF700        | Mouse       | 30-H12     | Biologend   | 0.05     |
|                                    | CD105           | FITC         | Mouse       | MJ7/18     | Biologend   | 3:200    |
|                                    | CD146 (MCAM)    | APC          | Mouse       | ME-9F1     | Biologend   | 3:200    |
|                                    | CD140a (PDGFRa) | BV605        | Mouse       | APA5       | Biologend   | 3:200    |
| Epithelial                         | CD326 (EpCAM)   | PERCP-CY5.5  | Mouse       | G8.8       | Biologend   | 3:200    |
| Endothelial                        | CD31 (PECAM-1)  | PE-CY7       | Mouse       | MEC13.3    | Biologend   | 3:200    |
| HPSCs                              | CD117 (ckit)    | APC750       | Mouse       | 2B8        | Biologend   | 3:200    |
|                                    | SCA-1           | FITC         | Mouse       | E13-161.7  | Biologend   | 3:200    |
|                                    |                 | APC          | Mouse       | E-13-161.7 | Biologend   | 3:200    |
|                                    | CD34            | PERCP-CY5.5  | Mouse       | HM34       | Biologend   | 5:200    |
|                                    | CD48            | APC-fire     | Mouse       | HM48-1     | Biologend   | 2.5:200  |
|                                    | CD150           | VB605        | Mouse       | A12 (7D4)  | Biologend   | 3:200    |
| Isthmin-1                          | ISM1            | PE           | Mouse       | B054B6     | Biologend   | 1.5:50   |
| Isotype control for anti-Isthmin-1 | IgG2b           | PE           | Mouse       | MPC-11     | Biologend   | 1.5:50   |
| GRP78/Bip                          | GRP78           | AF488        | Mouse/Human | C38        | Ebioscience | 3:200    |
| TLRs                               | TLR4            | PECy7        | Mouse       | SA15-21    | Biologend   | 3:200    |
|                                    | TLR5            | AF647        | Mouse       | ACT5       | Biologend   | 3:200    |
|                                    | TLR9            | FITC         | Mouse       | S18025A    | Biologend   | 2:200    |

Table S1. List of antibodies. General characteristics of the antibodies used during experimental procedures. Working dilutions are depicted.
